# Supplementary material for: In Silico Structural and Functional Analysis of the Mitochondrial Malate Transporters in Oleaginous Fungus Mucor circinelloides WJ11
Source: MDPI journal article supplement (doi:10.3390/catal13040705), 2023-04-06
Supplement: s1 [file s1]

A

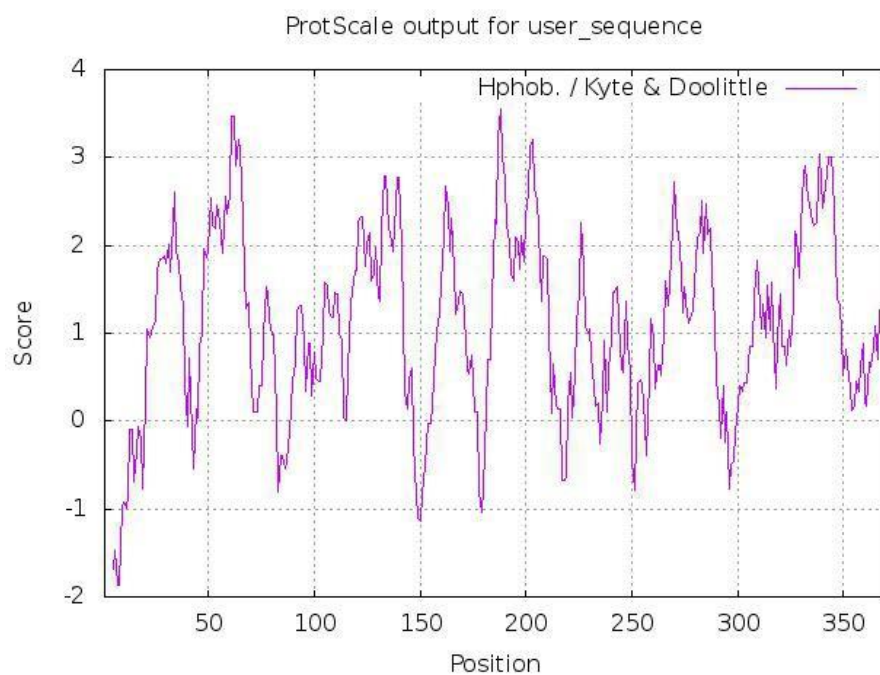

B

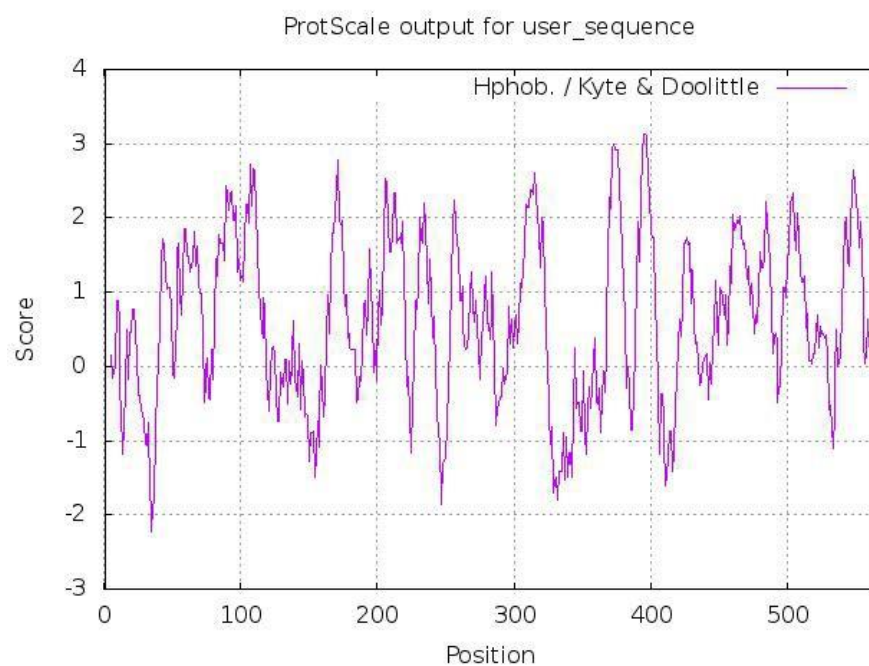

**Figure S1.** Prediction of hydrophobicity/hydrophilicity plot analysis of MT protein (A), SoDIT-a protein (B). Whereas, hydrophobicity  $>0$ , and hydrophilicity  $<0$ .
