# Supplementary material for: In Silico Structural and Functional Analysis of the Mitochondrial Malate Transporters in Oleaginous Fungus Mucor circinelloides WJ11
Source: MDPI journal article supplement (doi:10.3390/catal13040705), 2023-04-06
Supplement: s1 [file s1]

Archive with 1 entries (1 files):
- catalysts-2309514-supplementary.pdf
